# Supplementary material for: Enhancing Behavioral Intentions Toward Body Donation Through a Theory of Planned Behavior-Based, Culturally Tailored Educational Intervention: A Quasi-Experimental Study
Source: Research Square preprint supplement (doi:10.21203/rs.3.rs-7408051/v1), 2025-09-08
Supplement: Supplementary file 1 [file 65965eff0770ad54e771ebbf.docx]

**Questionnaire/Data Collection Sheet**

**Study Title:** Enhancing Behavioral Intentions Toward Body Donation Through a Theory of Planned Behavior-Based, Culturally Tailored Educational Intervention: A Quasi-Experimental Study

**Participant ID:** ________
**Date:** ________
**Interviewer’s Name / Initials:** ________
**Language of Questionnaire:** ☐ English ☐ Marathi

**Section 1: Demographic Information**

| **Variable** | **Response Options (Tick/Fill)** |
| --- | --- |
| Age (years) | _______ |
| Gender | ☐ Male ☐ Female ☐ Other |
| Religion | ☐ Hindu ☐ Muslim ☐ Christian ☐ Sikh ☐ Other: _______ |
| Education Level | ☐ No formal education ☐ Primary ☐ Secondary ☐ Graduate ☐ Postgraduate |
| Occupation | ______________________ |
| Marital Status | ☐ Single ☐ Married ☐ Widowed ☐ Divorced |
| Urban/Rural Residence | ☐ Urban ☐ Rural |
| Previous knowledge of body donation | ☐ Yes ☐ No |
| Have you ever registered for body donation? | ☐ Yes ☐ No |

**Section 2: Knowledge (Multiple Choice Questions - MCQs)**

1. Body donation means:
   ☐ Donating organs after death
   ☐ Donating the whole body to science
   ☐ Donating blood
   ☐ Donating tissues only
2. Which of the following is a benefit of body donation? (Select all that apply)
   ☐ Helps medical students learn anatomy
   ☐ Helps in surgical training
   ☐ Helps organ transplantation
   ☐ Helps medical research
3. Is body donation legally permitted in your country?
   ☐ Yes ☐ No ☐ Don’t know
4. Can family members decide not to donate your body after your death even if you registered?
   ☐ Yes ☐ No ☐ Don’t know

**Section 3: Attitudes toward Body Donation**

(Please indicate your level of agreement with the statements below.)

| **Statement** | **1 Strongly Disagree** | **2 Disagree** | **3 Neutral** | **4 Agree** | **5 Strongly Agree** |
| --- | --- | --- | --- | --- | --- |
| Donating my body after death is a valuable contribution to medical science. | ☐ | ☐ | ☐ | ☐ | ☐ |
| I feel comfortable when thinking about donating my body. | ☐ | ☐ | ☐ | ☐ | ☐ |
| Body donation is respectful to the deceased and their families. | ☐ | ☐ | ☐ | ☐ | ☐ |

**Section 4: Subjective Norms**

(Please indicate your level of agreement with the statements below.)

| **Statement** | **1 Strongly Disagree** | **2 Disagree** | **3 Neutral** | **4 Agree** | **5 Strongly Agree** |
| --- | --- | --- | --- | --- | --- |
| My family supports the idea of body donation. | ☐ | ☐ | ☐ | ☐ | ☐ |
| People important to me think I should donate my body. | ☐ | ☐ | ☐ | ☐ | ☐ |
| My religious/spiritual beliefs support body donation. | ☐ | ☐ | ☐ | ☐ | ☐ |

**Section 5: Perceived Behavioral Control**

(Please indicate your level of agreement with the statements below.)

| **Statement** | **1 Strongly Disagree** | **2 Disagree** | **3 Neutral** | **4 Agree** | **5 Strongly Agree** |
| --- | --- | --- | --- | --- | --- |
| I feel confident that I can register as a body donor. | ☐ | ☐ | ☐ | ☐ | ☐ |
| I know how to complete the process for body donation. | ☐ | ☐ | ☐ | ☐ | ☐ |
| I believe I have control over the decision to donate my body. | ☐ | ☐ | ☐ | ☐ | ☐ |

**Section 6: Behavioral Intention**

(Please indicate your level of agreement with the statements below.)

| **Statement** | **1 Definitely No** | **2 Probably No** | **3 Not Sure** | **4 Probably Yes** | **5 Definitely Yes** |
| --- | --- | --- | --- | --- | --- |
| I intend to register as a body donor in the next 6 months. | ☐ | ☐ | ☐ | ☐ | ☐ |
| I will encourage my family and friends to consider body donation. | ☐ | ☐ | ☐ | ☐ | ☐ |

**Section 7: Additional Comments or Barriers (Optional)**

Please write any thoughts or concerns you have about body donation:

**Instructions for Data Collectors:**

- Clarify each question if needed in participant's preferred language.
- Record answers accurately as provided.
- Maintain participant confidentiality.
- Thank the participant for their time.
