# Supplementary material for: Enhancing Behavioral Intentions Toward Body Donation Through a Theory of Planned Behavior-Based, Culturally Tailored Educational Intervention: A Quasi-Experimental Study
Source: Research Square preprint supplement (doi:10.21203/rs.3.rs-7408051/v1), 2025-09-08
Supplement: Supplementary file 2 [file d980e154c4c5a2cab5ef50b4.docx]

**Data Collection Sheet**

**Study Title:** Enhancing Behavioral Intentions Toward Body Donation Through a Theory of Planned Behavior-Based, Culturally Tailored Educational Intervention: A Quasi-Experimental Study

**Participant ID:** ________
**Date:** ________
**Interviewer’s Name / Initials:** ________
**Language of Questionnaire:** ☐ English ☐ Marathi

**Section 1: Demographic Information**

| **Variable** | **Response Options (Tick/Fill)** |
| --- | --- |
| Age (years) | _______ |
| Gender | ☐ Male ☐ Female ☐ Other |
| Religion | ☐ Hindu ☐ Muslim ☐ Christian ☐ Sikh ☐ Other: _______ |
| Education Level | ☐ No formal education ☐ Primary ☐ Secondary ☐ Graduate ☐ Postgraduate |
| Occupation | ______________________ |
| Marital Status | ☐ Single ☐ Married ☐ Widowed ☐ Divorced |
| Urban/Rural Residence | ☐ Urban ☐ Rural |
| Previous knowledge of body donation | ☐ Yes ☐ No |
| Have you ever registered for body donation? | ☐ Yes ☐ No |

**Section 2: Knowledge (Multiple Choice Questions - MCQs)**

1. Body donation means:
   ☐ Donating organs after death
   ☐ Donating the whole body to science
   ☐ Donating blood
   ☐ Donating tissues only
2. Which of the following is a benefit of body donation? (Select all that apply)
   ☐ Helps medical students learn anatomy
   ☐ Helps in surgical training
   ☐ Helps organ transplantation
   ☐ Helps medical research
3. Is body donation legally permitted in your country?
   ☐ Yes ☐ No ☐ Don’t know
4. Can family members decide not to donate your body after your death even if you registered?
   ☐ Yes ☐ No ☐ Don’t know

**Section 3: Attitudes toward Body Donation**

(Please indicate your level of agreement with the statements below.)

| **Statement** | **1 Strongly Disagree** | **2 Disagree** | **3 Neutral** | **4 Agree** | **5 Strongly Agree** |
| --- | --- | --- | --- | --- | --- |
| Donating my body after death is a valuable contribution to medical science. | ☐ | ☐ | ☐ | ☐ | ☐ |
| I feel comfortable when thinking about donating my body. | ☐ | ☐ | ☐ | ☐ | ☐ |
| Body donation is respectful to the deceased and their families. | ☐ | ☐ | ☐ | ☐ | ☐ |

**Section 4: Subjective Norms**

(Please indicate agreement with the following.)

| **Statement** | **1 Strongly Disagree** | **2 Disagree** | **3 Neutral** | **4 Agree** | **5 Strongly Agree** |
| --- | --- | --- | --- | --- | --- |
| My family supports the idea of body donation. | ☐ | ☐ | ☐ | ☐ | ☐ |
| People important to me think I should donate my body. | ☐ | ☐ | ☐ | ☐ | ☐ |
| My religious/spiritual beliefs support body donation. | ☐ | ☐ | ☐ | ☐ | ☐ |

**Section 5: Perceived Behavioral Control**

| **Statement** | **1 Strongly Disagree** | **2 Disagree** | **3 Neutral** | **4 Agree** | **5 Strongly Agree** |
| --- | --- | --- | --- | --- | --- |
| I feel confident that I can register as a body donor. | ☐ | ☐ | ☐ | ☐ | ☐ |
| I know how to complete the process for body donation. | ☐ | ☐ | ☐ | ☐ | ☐ |
| I believe I have control over the decision to donate my body. | ☐ | ☐ | ☐ | ☐ | ☐ |

**Section 6: Behavioral Intention**

| **Statement** | **1 Definitely No** | **2 Probably No** | **3 Not Sure** | **4 Probably Yes** | **5 Definitely Yes** |
| --- | --- | --- | --- | --- | --- |
| I intend to register as a body donor in the next 6 months. | ☐ | ☐ | ☐ | ☐ | ☐ |
| I will encourage my family and friends to consider body donation. | ☐ | ☐ | ☐ | ☐ | ☐ |

**Section 7: Additional Comments or Barriers (Optional)**

Please write any thoughts or concerns you have about body donation:

**Instructions for Data Collectors:**

- Clarify each question if needed in participant’s preferred language.
- Record answers accurately as provided.
- Maintain participant confidentiality.
- Thank the participant for their time.

**डेटा गोळा करण्याचा फॉर्म**

**अभ्यासाचे शीर्षक:** शरीरदान प्रोत्साहनासाठी सिद्धांतआधारित, सांस्कृतिकदृष्ट्या संवेदनशील शिक्षण कार्यक्रमाचे मूल्यांकन

**सहभागी क्रमांक:** ________
**दिनांक:** ________
**संवादकाचे नाव / सुरळीत अक्षरे:** ________
**प्रश्नावलीची भाषा:** ☐ इंग्रजी ☐ मराठी

**विभाग १: वैयक्तिक माहिती**

| **घटक** | **उत्तर (टिक करा / भरा)** |
| --- | --- |
| वय (वर्षे) | _______ |
| लिंग | ☐ पुरुष ☐ स्त्री ☐ इतर |
| धर्म | ☐ हिंदू ☐ मुस्लिम ☐ ख्रिश्चन ☐ शीख ☐ इतर: _______ |
| शैक्षणिक पातळी | ☐ कोणतीही शैक्षणिक पदवी नाही ☐ प्राथमिक ☐ माध्यमिक ☐ पदवीधर ☐ पदव्युत्तर |
| व्यवसाय | __________________________ |
| वैवाहिक स्थिती | ☐ अविवाहित ☐ विवाहित ☐ विधवा/विधुर ☐ घटस्फोटित |
| शहर / ग्रामीण रहिवास | ☐ शहर ☐ ग्रामीण |
| शरीरदानाबद्दल पूर्व माहिती आहे का? | ☐ होय ☐ नाही |
| आपण कधी शरीरदानासाठी नोंदणी केली आहे का? | ☐ होय ☐ नाही |

**विभाग २: ज्ञान (बहुपर्यायी प्रश्न - MCQs)**

1. शरीरदान म्हणजे काय?
   ☐ मृत्यूनंतर अवयव देणे
   ☐ संपूर्ण शरीर शास्त्रासाठी देणे
   ☐ रक्तदान करणे
   ☐ फक्त ऊतक देणे
2. शरीरदानाचे कोणते फायदे आहेत? (सर्व लागू असलेले निवडा)
   ☐ वैद्यकीय विद्यार्थ्यांना शरीरशास्त्र शिकण्यास मदत करते
   ☐ शस्त्रक्रिया प्रशिक्षणासाठी मदत करते
   ☐ अवयव प्रत्यारोपणासाठी मदत करते
   ☐ वैद्यकीय संशोधनासाठी मदत करते
3. आपल्या देशात शरीरदान कायदेशीर आहे का?
   ☐ होय ☐ नाही ☐ माहिती नाही
4. आपण नोंदणी केलेली असली तरीही, कुटुंबीय शरीरदानावर निर्णय बदलू शकतात का?
   ☐ होय ☐ नाही ☐ माहिती नाही

**विभाग ३: शरीरदानाबद्दल धारणा**

| **विधान** | **१ अत्यंत नाकारात्मक** | **२ नाकारात्मक** | **३ तटस्थ** | **४ सकारात्मक** | **५ अत्यंत सकारात्मक** |
| --- | --- | --- | --- | --- | --- |
| मृत्यूनंतर माझे शरीर दान करणे वैद्यकीय विज्ञानासाठी मौल्यवान आहे. | ☐ | ☐ | ☐ | ☐ | ☐ |
| शरीरदानाचा विचार करताना मला आरामदायक वाटते. | ☐ | ☐ | ☐ | ☐ | ☐ |
| शरीरदान मृत तसे आणि त्यांच्या कुटुंबियांसाठी सन्मानाच्या आहे. | ☐ | ☐ | ☐ | ☐ | ☐ |

**विभाग ४: सामाजिक नियम (Subjective Norms)**

| **विधान** | **१ अत्यंत नाकारात्मक** | **२ नाकारात्मक** | **३ तटस्थ** | **४ सकारात्मक** | **५ अत्यंत सकारात्मक** |
| --- | --- | --- | --- | --- | --- |
| माझे कुटुंब शरीरदानाला समर्थन देते. | ☐ | ☐ | ☐ | ☐ | ☐ |
| माझ्यासाठी महत्त्वाचे लोक मला शरीरदान करावे असे विचारतात. | ☐ | ☐ | ☐ | ☐ | ☐ |
| माझे धार्मिक / आध्यात्मिक विश्वास शरीरदानाला प्रोत्साहन देतात. | ☐ | ☐ | ☐ | ☐ | ☐ |

**विभाग ५: प्रत्यक्ष नियंत्रणाची जाणीव (Perceived Behavioral Control)**

| **विधान** | **१ अत्यंत नाकारात्मक** | **२ नाकारात्मक** | **३ तटस्थ** | **४ सकारात्मक** | **५ अत्यंत सकारात्मक** |
| --- | --- | --- | --- | --- | --- |
| मला शरीरदानासाठी नोंदणी करता यावी अशी खात्री वाटते. | ☐ | ☐ | ☐ | ☐ | ☐ |
| मला शरीरदान प्रक्रियेमध्ये काय करायचे आहे हे माहिती आहे. | ☐ | ☐ | ☐ | ☐ | ☐ |
| मला वाटते की शरीरदानाचा निर्णय माझ्या नियंत्रणात आहे. | ☐ | ☐ | ☐ | ☐ | ☐ |

**विभाग ६: वर्तनात्मक उद्दिष्ट / मानसशास्त्रीय हेतू (Behavioral Intention)**

| **विधान** | **१ नक्की नाही** | **२ कदाचित नाही** | **३ निश्चित नाही** | **४ कदाचित होय** | **५ नक्की होय** |
| --- | --- | --- | --- | --- | --- |
| पुढील ६ महिन्यांत मी शरीरदानासाठी नोंदणी करणार आहे. | ☐ | ☐ | ☐ | ☐ | ☐ |
| मी माझ्या कुटुंबीय व मित्रांना शरीरदानाचा विचार करण्यास प्रोत्साहित करेन. | ☐ | ☐ | ☐ | ☐ | ☐ |

**विभाग ७: अतिरिक्त अभिप्राय / अडथळे (ऐच्छिक)**

शरीरदानाबद्दल आपले कोणतेही विचार, चिंता किंवा अडथळे येथे लिहा:

**डेटा संकलकांसाठी सूचना:**

- सहभागीच्या आवडत्या भाषेत प्रश्न स्पष्ट करा.
- उत्तरे अचूक नोंदवा.
- सहभागींच्या गोपनीयतेचे पालन करा.
- सहभागीचे आभार मानणे विसरू नका.
